# Supplementary material for: Potent Virucidal Activity In Vitro of Photodynamic Therapy with Hypericum Extract as Photosensitizer and White Light against Human Coronavirus HCoV-229E
Source: MDPI journal article supplement (doi:10.3390/pharmaceutics14112364), 2022-11-02
Supplement: s1 [file s1]

**BOLETÍN DE ANÁLISIS**

PRODUCTO: **HIPERICO EXTO SECO**

LOTE: 13651/6

CAD: 04/2021

LOTE DE FABRICANTE: J-180413-HP

CARACTERÍSTICAS

|                            |                                             |
|----------------------------|---------------------------------------------|
| <b>DESCRIPCIÓN:</b>        | Polvo marrón de sabor y olor característico |
| <b>SOLUBILIDAD:</b>        | Moderadamente soluble                       |
| <b>NOMBRE LATÍN</b>        | Hypericum perforatum L.                     |
| <b>EXCIPIENTE</b>          | Maltodextrina < 10 %                        |
| <b>SOLVENTE EXTRACCION</b> | Agua - Etanol                               |
| <b>RATIO EXTRACCION</b>    | 8:1                                         |
| <b>PARTE USADA</b>         | Hierba                                      |

ENSAYOS

| <u>PARÁMETRO</u>                                | <u>ESPECIFICACIÓN</u> | <u>RESULTADO</u> |
|-------------------------------------------------|-----------------------|------------------|
| <b>TAMAÑO</b>                                   | 80 MESH               | Conforme (0)     |
| <b>DENSIDAD RELATIVA</b>                        | 40-60 g/100ml         | 51,0 g/100ml (0) |
| <b>TOTAL CENIZAS</b>                            | < =10 %               | 5,27 % (0)       |
| <b>PERDIDA POR DESECACION<br/>(1g/105°C/2h)</b> | <= 5 %                | 4,89 % (0)       |
| <b>TITULO UV</b>                                | >= 0,3 % HYPERCINA    | 0,35 % (0)       |
| <b>RATIO</b>                                    | 8:1                   | Conforme (0)     |
| <b>SOLVENTES RESIDUALES</b>                     | Cumple Ph.Eur. 7.0    | Conforme (0)     |
| <b>METALES PESADOS</b>                          |                       |                  |
| <b>As</b>                                       | < 2 ppm               | Conforme (0)     |
| <b>Pb</b>                                       | < 3 ppm               | Conforme (0)     |
| <b>Cd</b>                                       | < 1 ppm               | Conforme (0)     |
| <b>Hg</b>                                       | < 0,1 ppm             | Conforme (0)     |
| <b>PESTICIDAS</b>                               | USP36-561             | Conforme (0)     |
| <b>AFLATOXINA B1- B1,B2,G1,G2</b>               | < 2 ppb - < 4 ppb     | Conforme (0)     |
| <b>AEROBIOS TOALES</b>                          | < 10000 ufc/g         | Conforme (0)     |

PRUEBALaboratorios :0 Datos suministrados por el fabricante o distribuidor autorizado

Firmado: CARMEN TOROLLO

Fecha de Expedición: 26/03/2020



Departamento Técnico  
Luis Fernández/Carmen Torollo

**BOLETÍN DE ANÁLISIS**

PRODUCTO: **HIPERICO EXTO SECO**

LOTE: 13651/6

CAD: 04/2021

LOTE DE FABRICANTE: J-180413-HP

| <u>PARÁMETRO</u>         | <u>ESPECIFICACIÓN</u> | <u>RESULTADO</u> |
|--------------------------|-----------------------|------------------|
| <b>MOHOS Y LEVADURAS</b> | < 1000 ufc/g          | Conforme (0)     |
| <b>P. AUREGINOSA</b>     | AUSENCIA              | AUSENCIA (0)     |
| <b>E. COLI</b>           | AUSENCIA              | AUSENCIA (0)     |
| <b>S.AUREUS</b>          | AUSENCIA              | AUSENCIA (0)     |
| <b>SALMONELLA</b>        | AUSENCIA              | AUSENCIA (0)     |
| <b>BENZOPIRENOS</b>      | =< 10 ppb GC/MS       | Conforme (0)     |
| <b>PAH'S</b>             | =< 50 ppb             | Conforme (0)     |
| <b>IRRADIACIÓN</b>       | =< 700                | Conforme (0)     |

**OBSERVACIONES:** Cumple especificaciones fabricante. Producto libre OGM, Alérgenos, BSE/TSE

**CONSERVACIÓN:** Envase bien cerrado. Conservar en lugar fresco y oscuro, alejado de la luz.  
Conservar a temperatura no superior a 30°C.

**CALIFICACIÓN:** APTO

PRUEBA Laboratorios :0 Datos suministrados por el fabricante o distribuidor autorizado

Firmado: CARMEN TOROLLO

26/03/2020

Fecha de Expedición:

Departamento Técnico

Luis Fernández/Carmen Torollo
