# Supplementary material for: Potent Virucidal Activity In Vitro of Photodynamic Therapy with Hypericum Extract as Photosensitizer and White Light against Human Coronavirus HCoV-229E
Source: MDPI journal article supplement (doi:10.3390/pharmaceutics14112364), 2022-11-02
Supplement: s1 [file s1]

Photoactivation effect of *Hypericum* Extract in viral infection  
Experimental design

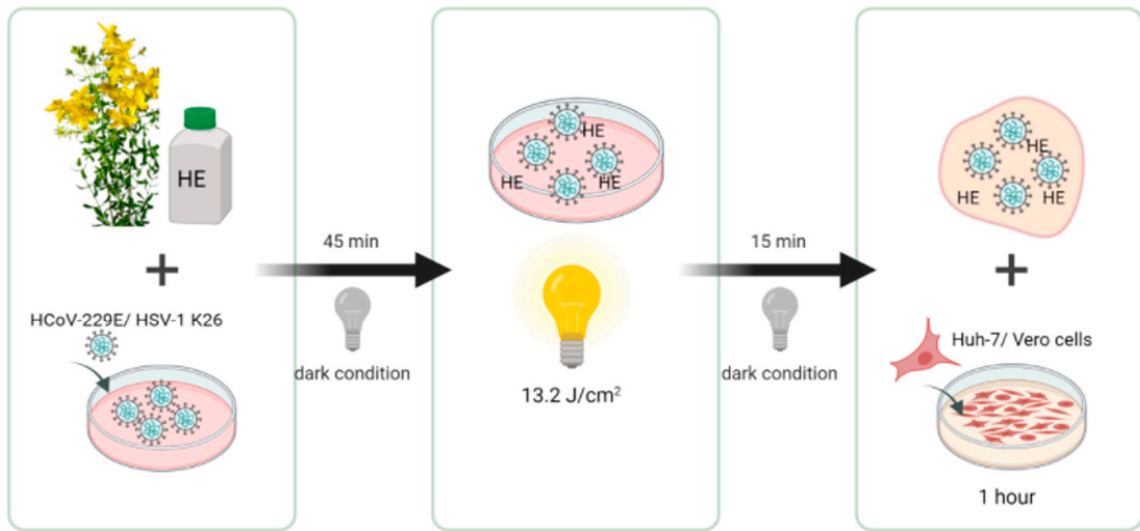

**Figure S1.** Photoactivation effect of *Hypericum* Extract in viral infection. Experimental design.

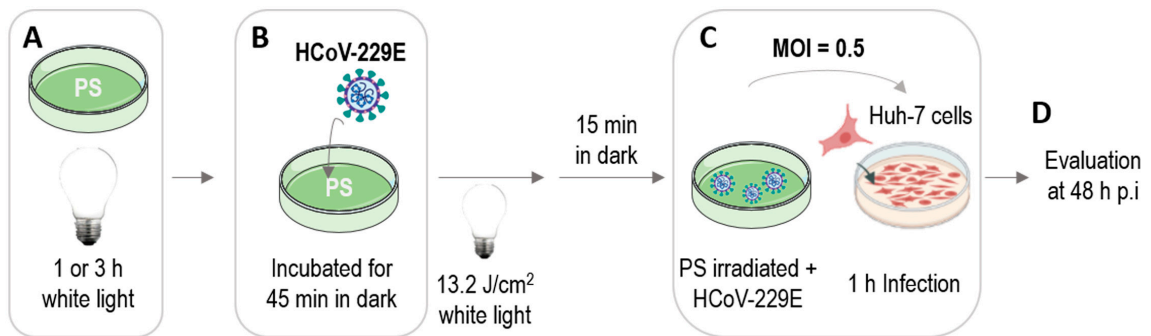

**Figure S2.** Experimental design of Figure 5.

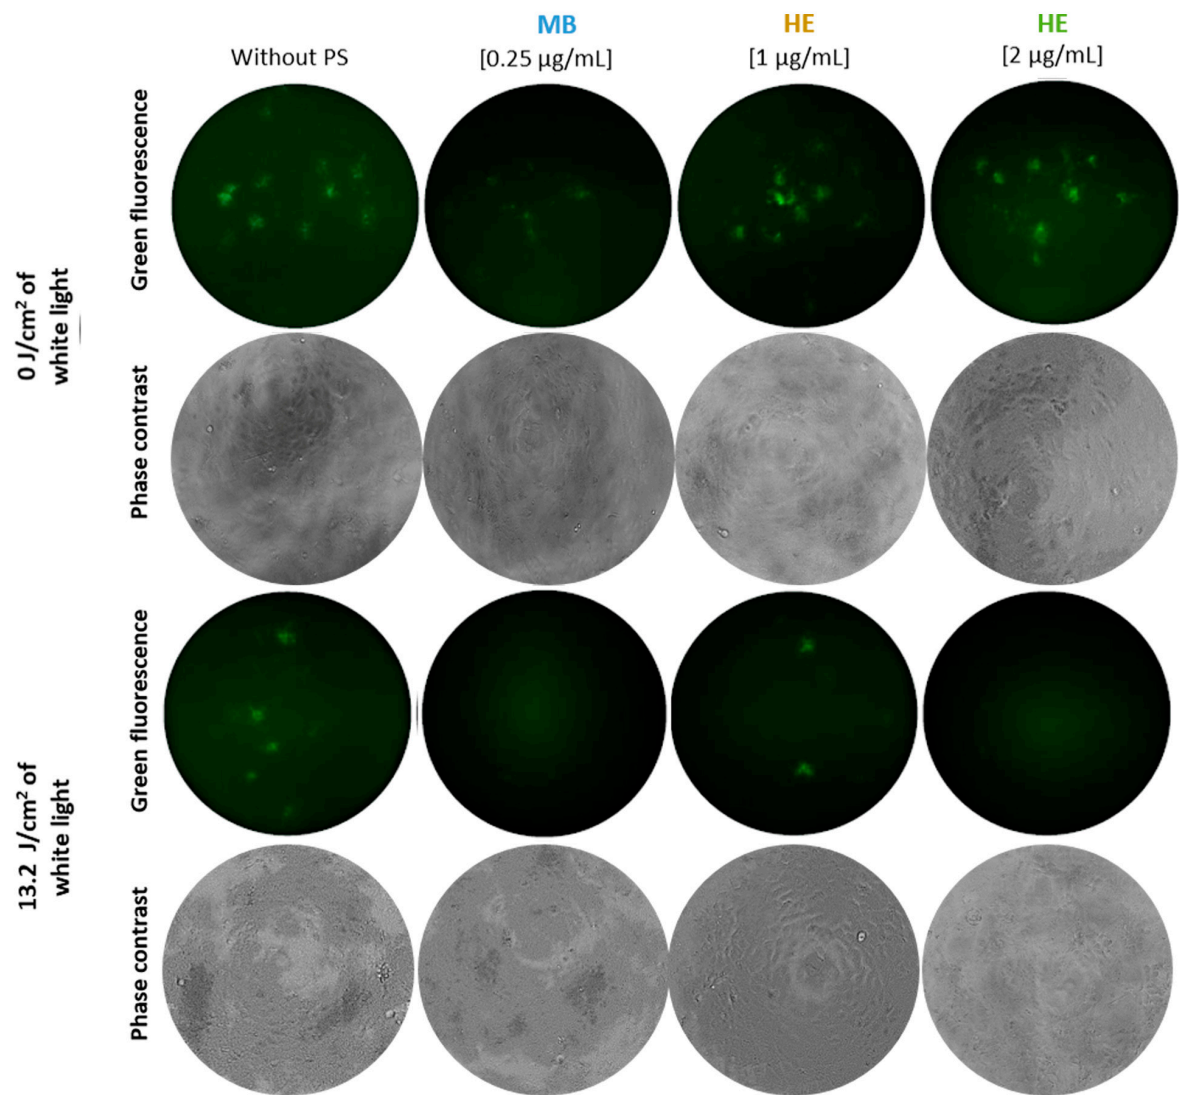

Figure S3. Figure 3 with brightfield.

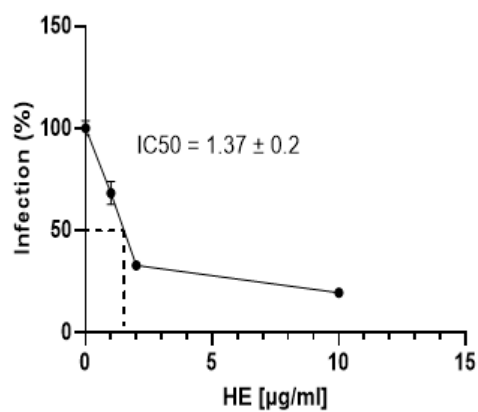

Figure S4. Maximum inhibitory concentration (IC<sub>50</sub>) of HE against HCoV-229E.

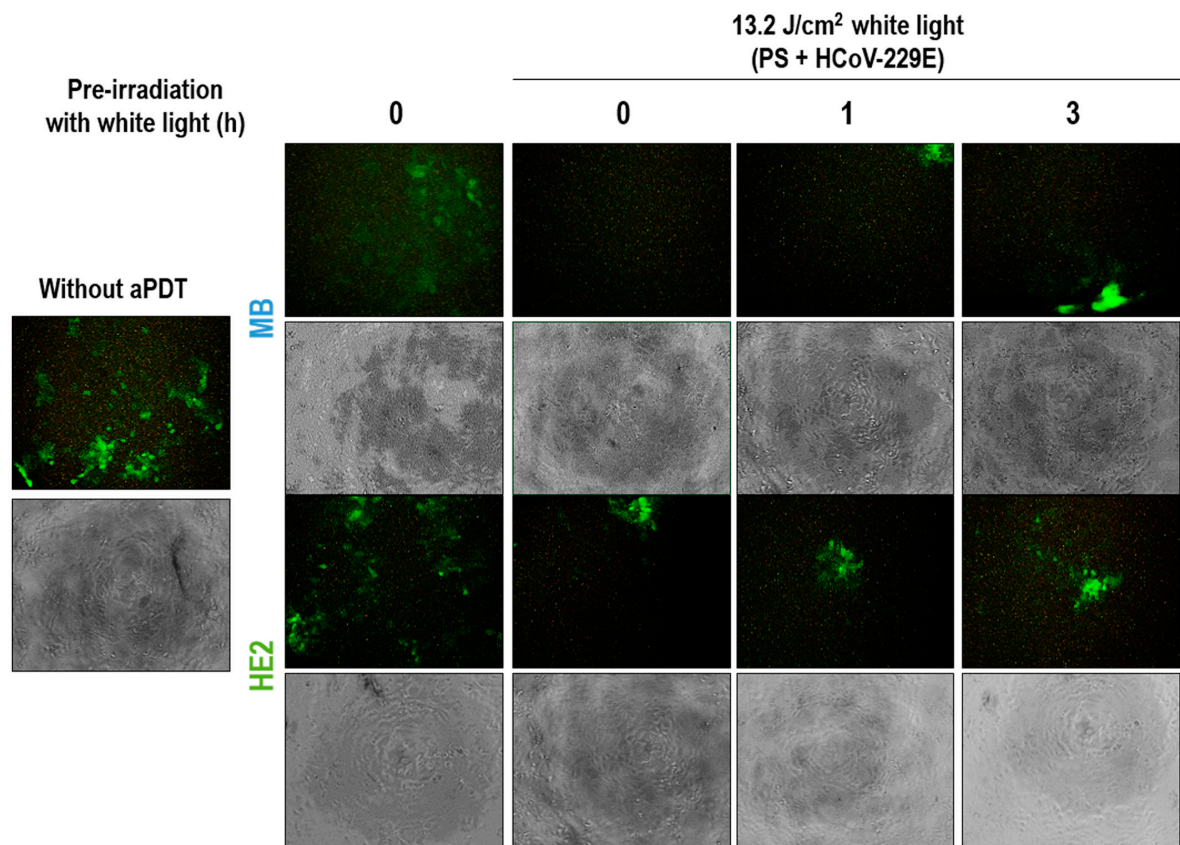

**Figure S5.** Figure 5 with brightfield.
