# Supplementary material for: Potent Virucidal Activity In Vitro of Photodynamic Therapy with Hypericum Extract as Photosensitizer and White Light against Human Coronavirus HCoV-229E
Source: MDPI journal article supplement (doi:10.3390/pharmaceutics14112364), 2022-11-02
Supplement: s1 [file s1]

## PRODUCT SPECIFICATION

Product name: **HYPERICUM EXTRACT - DRY**

**BATCH:** 13651/6

**EXPIRATION DATE:** 04/2021

**PRODUCTION BATCH:** J-180413-HP

### Characteristics

**DESCRIPTION:** Brown powder with characteristic taste and odor

**SOLUBILITY:** Moderately soluble

**LATIN NAME:** Hypericum perforatum L.

**EXCIPIENTS:** Maltodextrin < 10 %

**SOLVENT EXTRACTION:** Water-Ethanol

**EXTRACTION RATIO:** 8:1

**USED PART:** herb

### Assays

| <u>Parameter</u>                       | <u>Specification</u> | <u>Result</u>   |
|----------------------------------------|----------------------|-----------------|
| <b>SIZE</b>                            | 80 MESH              | Conforming (0)  |
| <b>RELATIVE DENSITY</b>                | 40-60 g/100ml        | 51.0g/100ml (0) |
| <b>TOTAL ASHES</b>                     | < =10 %              | 5.27% (0)       |
| <b>LOSS ON DRYING</b><br>(1g/105°C/2h) | <= 5 %               | 4.89% (0)       |
| <b>UV TITLE</b>                        | >= 0,3 % HYPERCIN    | 0.35% (0)       |
| <b>RATIO</b>                           | 8:1                  | Conforming (0)  |
| <b>RESIDUAL SOLVENTS</b>               | Cumple Ph.Eur. 7.0   | Conforming (0)  |
| <b>HEAVY METALS</b>                    |                      |                 |
| <b>As</b>                              | < 2 ppm              | Conforming (0)  |
| <b>Pb</b>                              | < 3 ppm              | Conforming (0)  |
| <b>Cd</b>                              | < 1 ppm              | Conforming (0)  |
| <b>Hg</b>                              | < 0.1 ppm            | Conforming (0)  |
| <b>PESTICIDES</b>                      | USP36-561            | Conforming (0)  |
| <b>AFLATOXIN B2-B1,B2,G1,G2</b>        | < 2 ppb - < 4 ppb    | Conforming (0)  |
| <b>TOTAL AEROBES</b>                   | < 10000 ufc/g        | Conforming (0)  |

TESTING Laboratories : 0 Data supplied by the manufacturer or authorized distributor

Signed: CARMEN TOROLLO

Date of issue: 26/03/2020 (dd/mm/yyyy)

## PRODUCT SPECIFICATION

Product name: **HYPERICUM EXTRACT - DRY**

**BATCH:** 13651/6

**EXPIRATION DATE:** 04/2021

**PRODUCTION BATCH:** J-180413-HP

| <u>Parameter</u>         | <u>Specification</u> | <u>Result</u>  |
|--------------------------|----------------------|----------------|
| <b>MOULDS AND YEASTS</b> | < 1000 ufc/g         | Conforming (0) |
| <b>P. AERUGINOSA</b>     | ABSENCE              | ABSENCE (0)    |
| <b>E. COLI</b>           | ABSENCE              | ABSENCE (0)    |
| <b>S. AUREUS</b>         | ABSENCE              | ABSENCE (0)    |
| <b>SALMONELLA</b>        | ABSENCE              | ABSENCE (0)    |
| <b>BENZOPYRENS</b>       | =< 10 ppb GC/MS      | Conforming (0) |
| <b>PAH'S</b>             | =< 50 ppb            | Conforming (0) |
| <b>IRRADIATION</b>       | =< 700               | Conforming (0) |

**REMARKS:** Meets manufacturer specifications. Free product, GMO, Allergen, BSE/TSE free product.

**CONSERVATION:** Keep in a cool, dark place, away from light. Store at a temperature not exceeding 30°C.

**RATING:** SUITABLE

TESTING Laboratories :0 Data supplied by the manufacturer or authorized distributor

Signed: CARMEN TOROLLO

Date of issue: 26/03/2020 (dd/mm/yyyy)
